# Supplementary material for: Neutral, heteroleptic copper(i)-4H-imidazolate complexes: synthesis and characterization of their structural, spectral and redox properties
Source: Royal Society of Chemistry journal article supplement (doi:10.1039/c5dt04435a), 2016-01-01
Supplement: c5dt04435a1.pdf [file c5dt04435a1.pdf]

## Electronic Supplementary Information

### Neutral, heteroleptic copper(I)-4*H*-imidazolate complexes: synthesis and characterization of their structural, spectral and redox properties

M. Schulz,\* F. Dröge, F. Herrmann-Westendorf, J. Schindler, H. Görls, M. Presselt

[martin.schulz.1@uni-jena.de](mailto:martin.schulz.1@uni-jena.de)

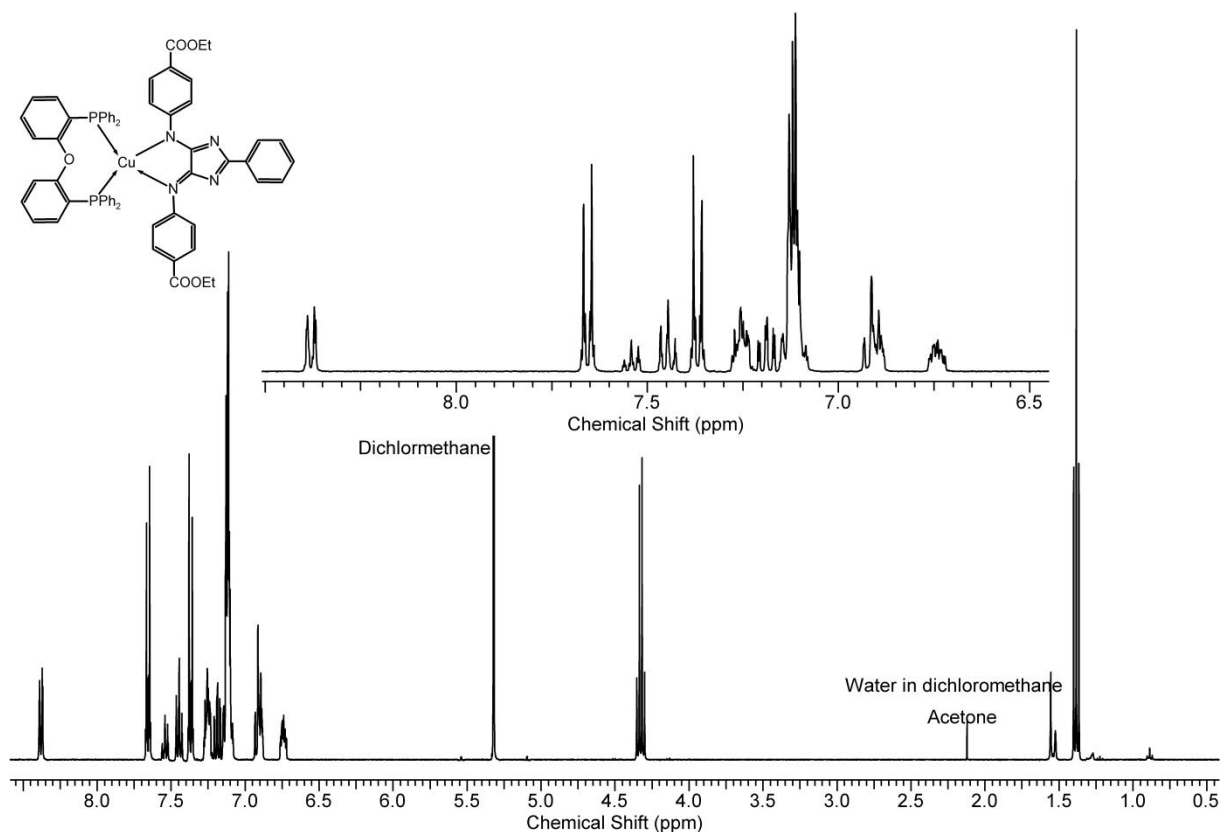

Figure S1 presents the <sup>1</sup>H-NMR spectrum of **CuN1P1** in dichloromethane-*D*<sub>2</sub> at room temperature. The inset depicts the aromatic region.

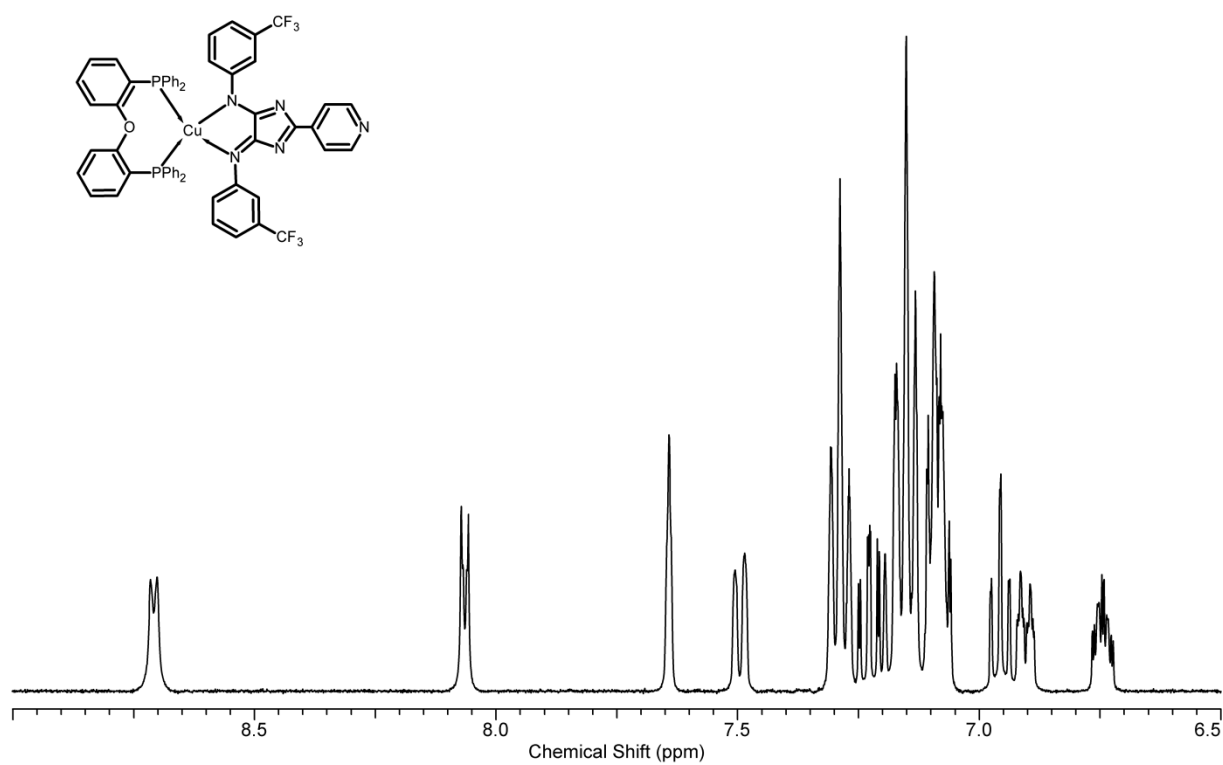

Figure S2 presents the  $^1\text{H}$ -NMR spectrum of CuN2P1 in acetonitrile- $\text{D}_3$  at room temperature.

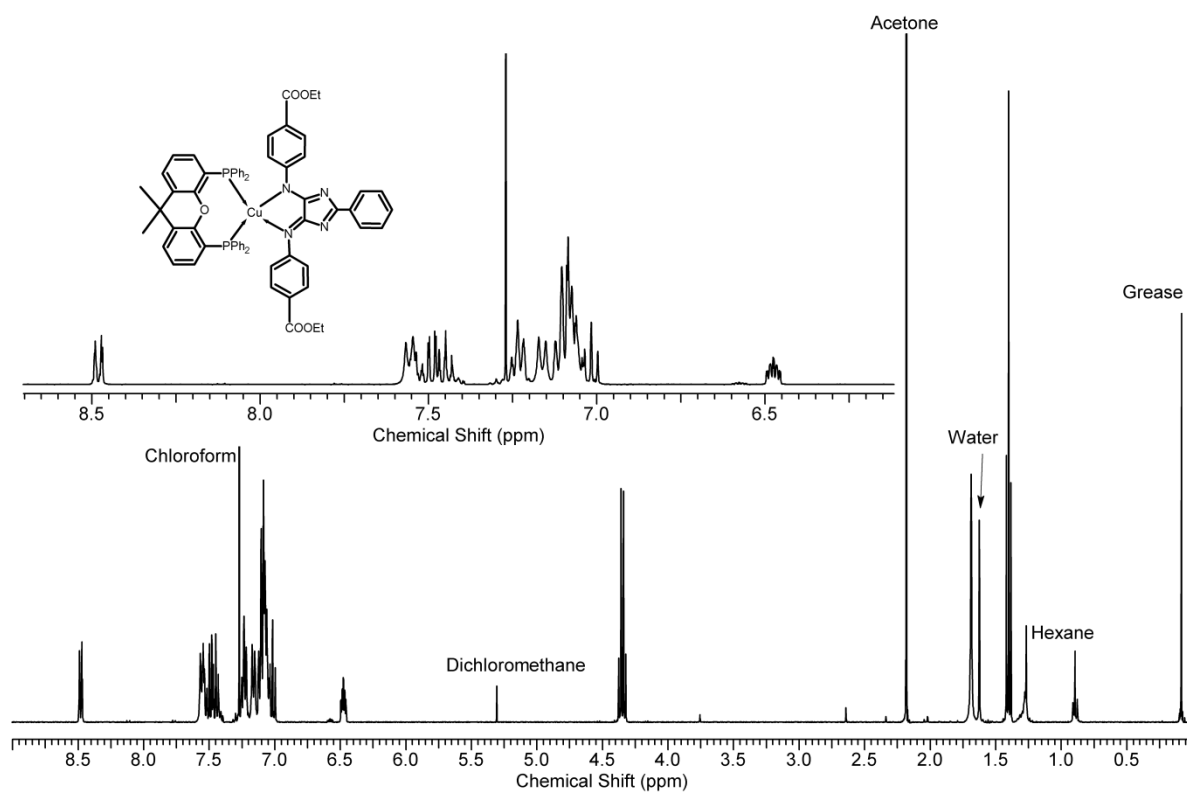

Figure S3 presents the  $^1\text{H}$ -NMR spectrum of **CuN1P2** in chloroform- $\text{D}$  at room temperature. The inset depicts the aromatic region.

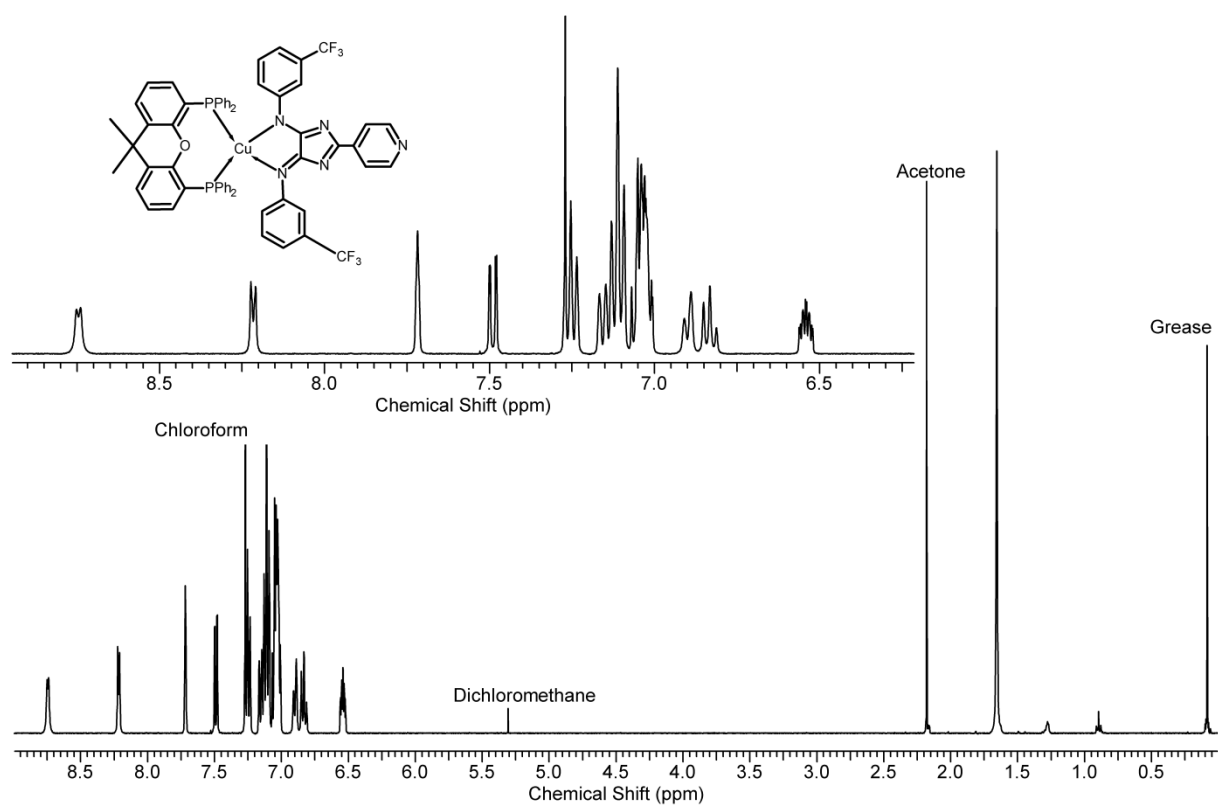

Figure S4 presents the  $^1\text{H}$ -NMR spectrum of **CuN2P2** in chloroform-D at room temperature. The inset depicts the aromatic region.

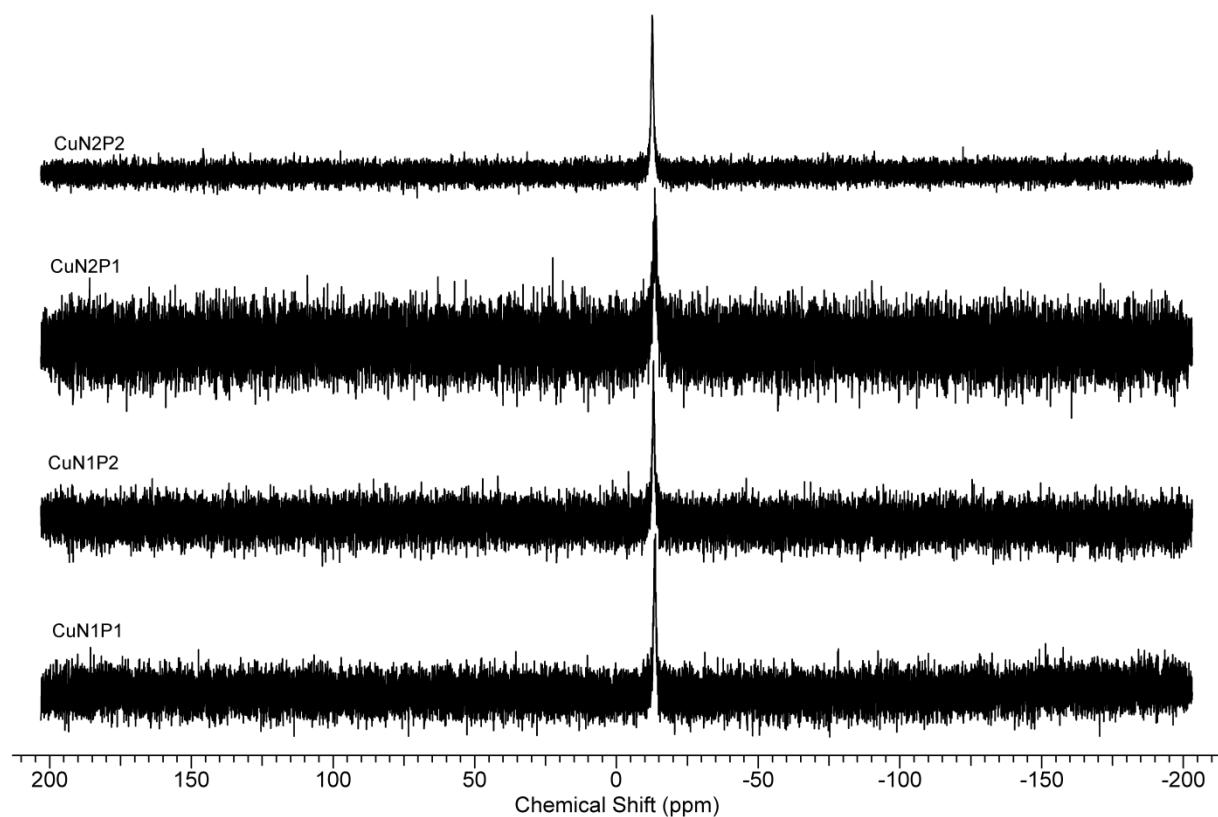

Figure S5 presents the  $^{31}\text{P}$ -NMR spectra of the complexes at room temperature.

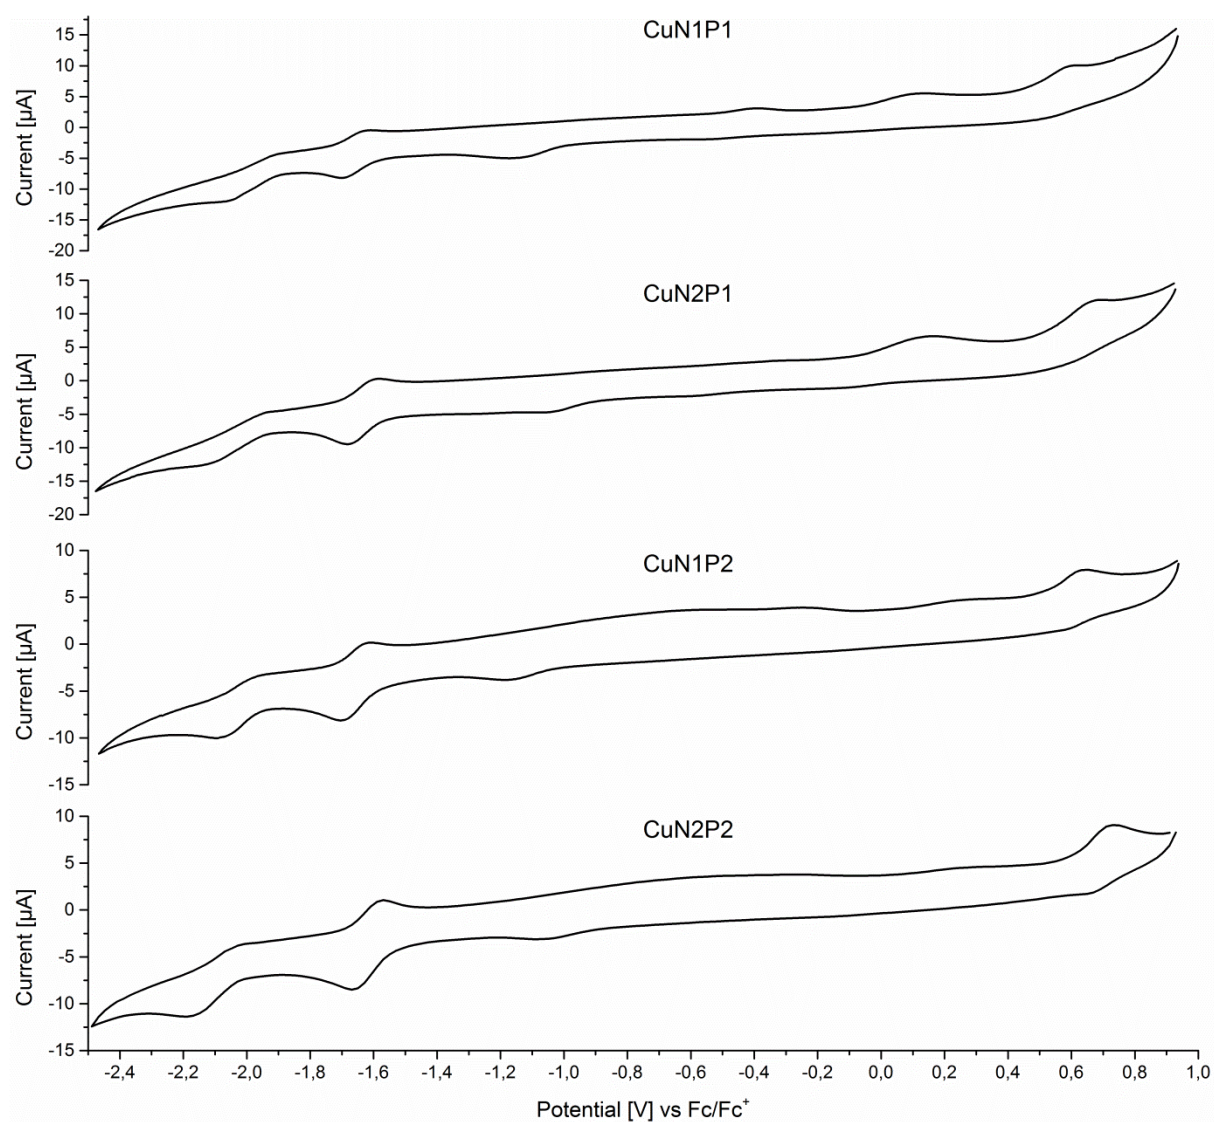

Figure S6 gives the CV curves of the complexes in dichloromethane with 0.1 M tetra-butylammonium  $\text{BF}_4^-$  vs.  $\text{Fc}/\text{Fc}^+$  with a scan rate of 0.05 V/s.

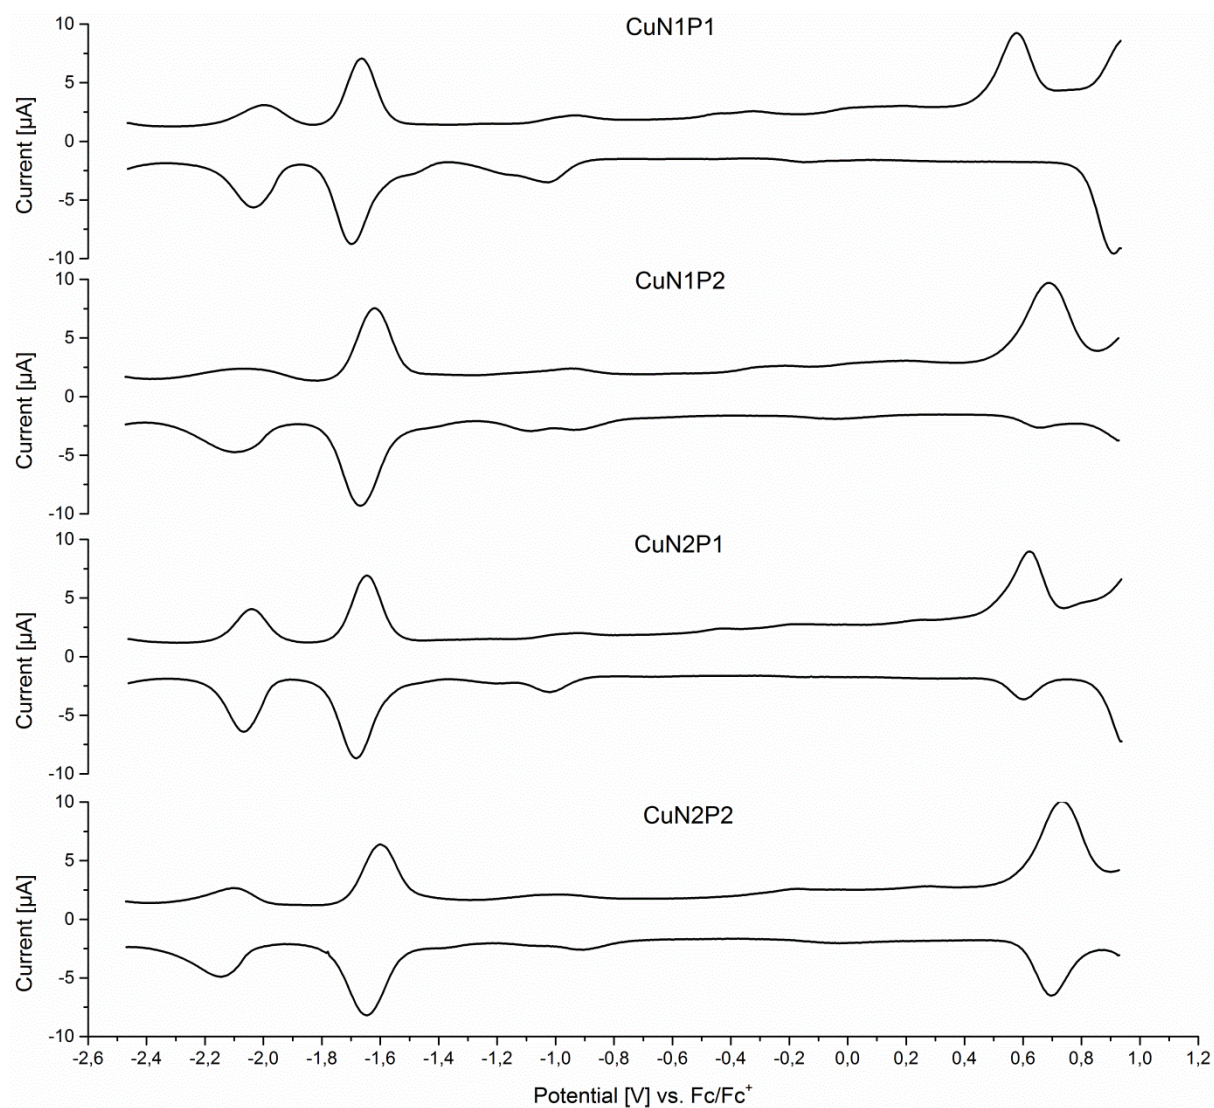

Figure S7 gives the square wave voltammetry curves in in dichloromethane with 0.1 M tetra-butylammonium  $\text{BF}_4^-$  vs.  $\text{Fc}/\text{Fc}^+$  taken at 64 Hz with a step potential of 5 mV.

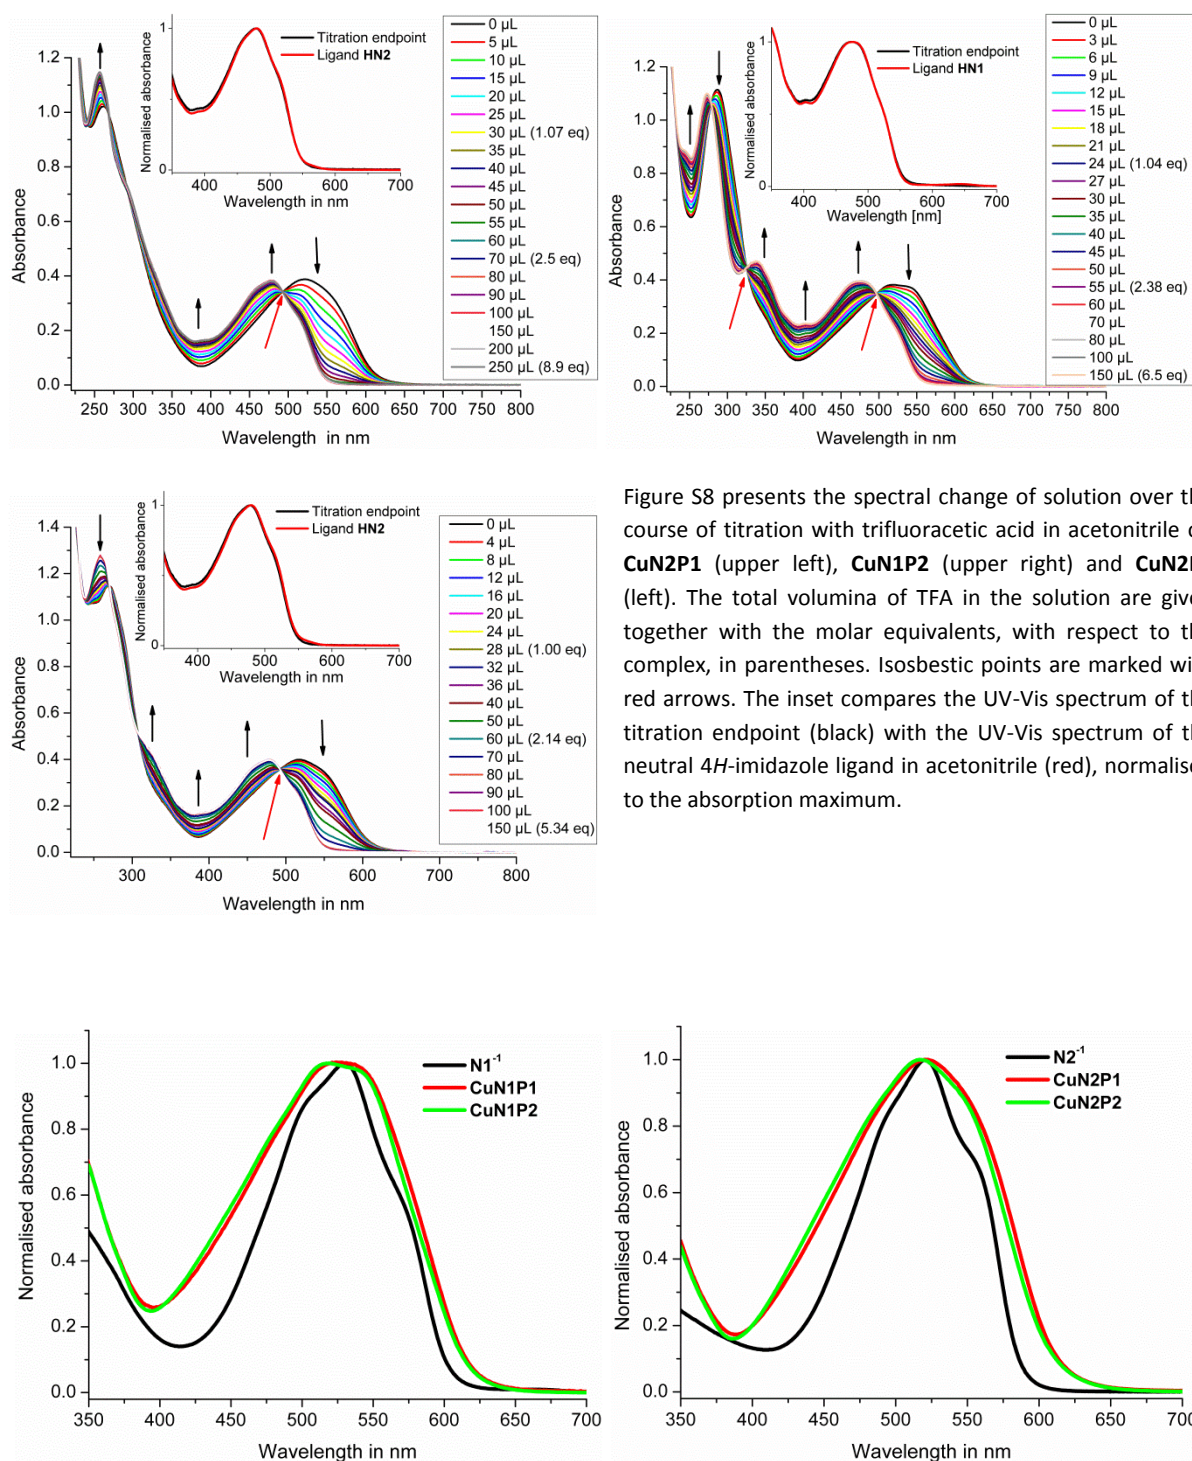

Figure S9 gives a comparison of the UV-Vis absorption spectra between 350-700 nm of the deprotonated 4*H*-imidazole ligands (left: **N1<sup>-</sup>**, right: **N2<sup>-</sup>**) with the respective complexes.

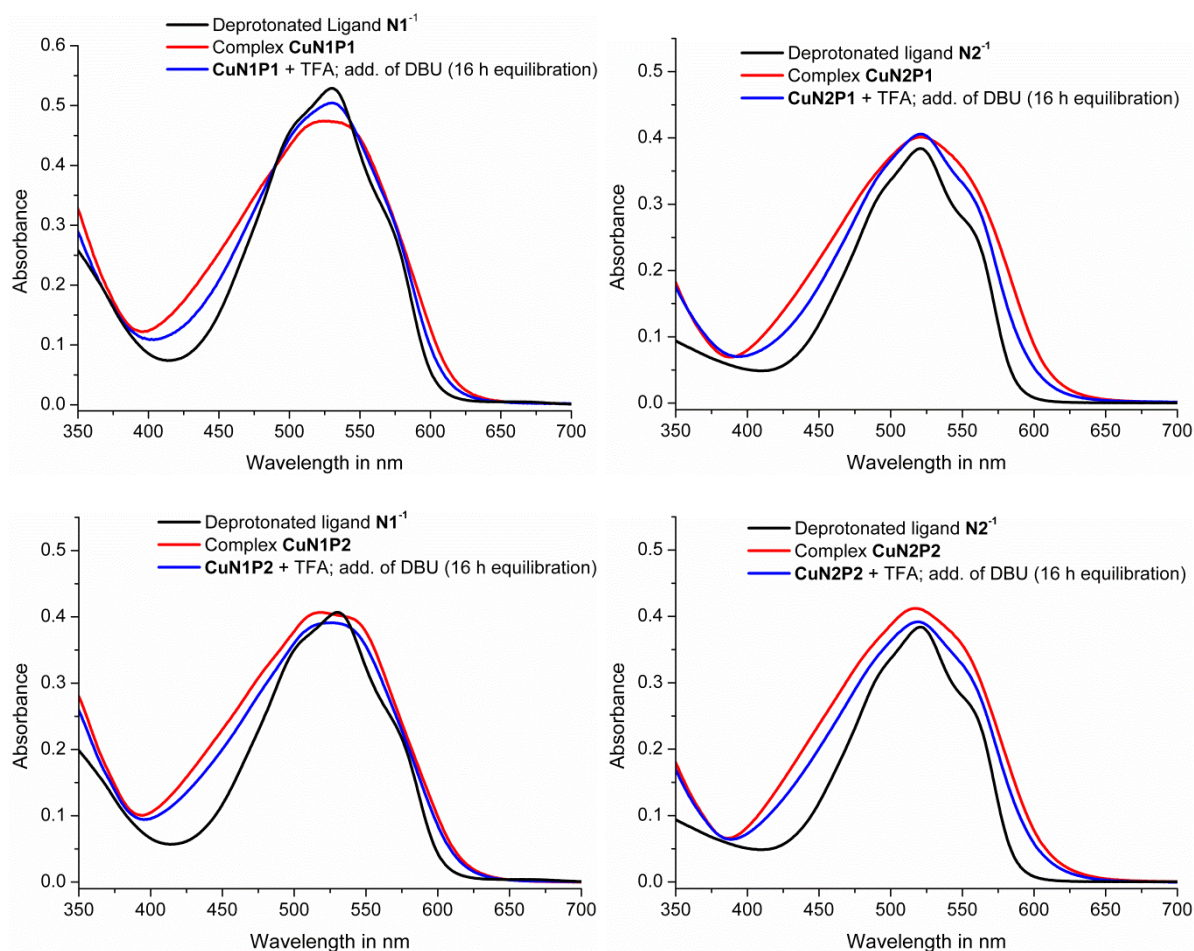

Figure S10 gives a comparison of the UV-Vis absorption between 350-700 nm of the deprotonated 4*H*-imidazole ligands (black), the respective complexes (red) and the spectrum after protonation and decomposition of the complex by addition of excess trifluoroacetic acid (TFA) and subsequent addition of 1,7-diazabicyclo-undec-7-ene (DBU) and 16 h of equilibration in order to recover the complex (blue). The blue spectrum indicates that the complex is not fully recovered after addition of DBU. The extent of recovery reflects the synthetic yields of the complex formation.

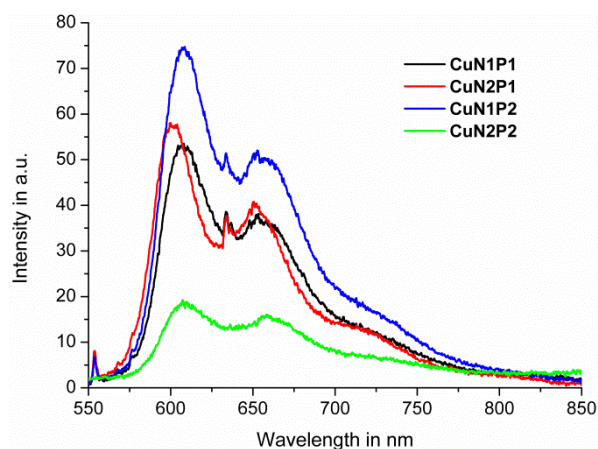

Figure S11 presents the emission spectra of **Cu1P1 – CuN2P2** in dichloromethane solution (not deaerated) upon excitation at 532 nm with a frequency-doubled Nd:YAG laser (5 mW). The weak peaks between 550 and 580nm are Raman bands of the solvent. The small peak at 640 nm is an artefact.

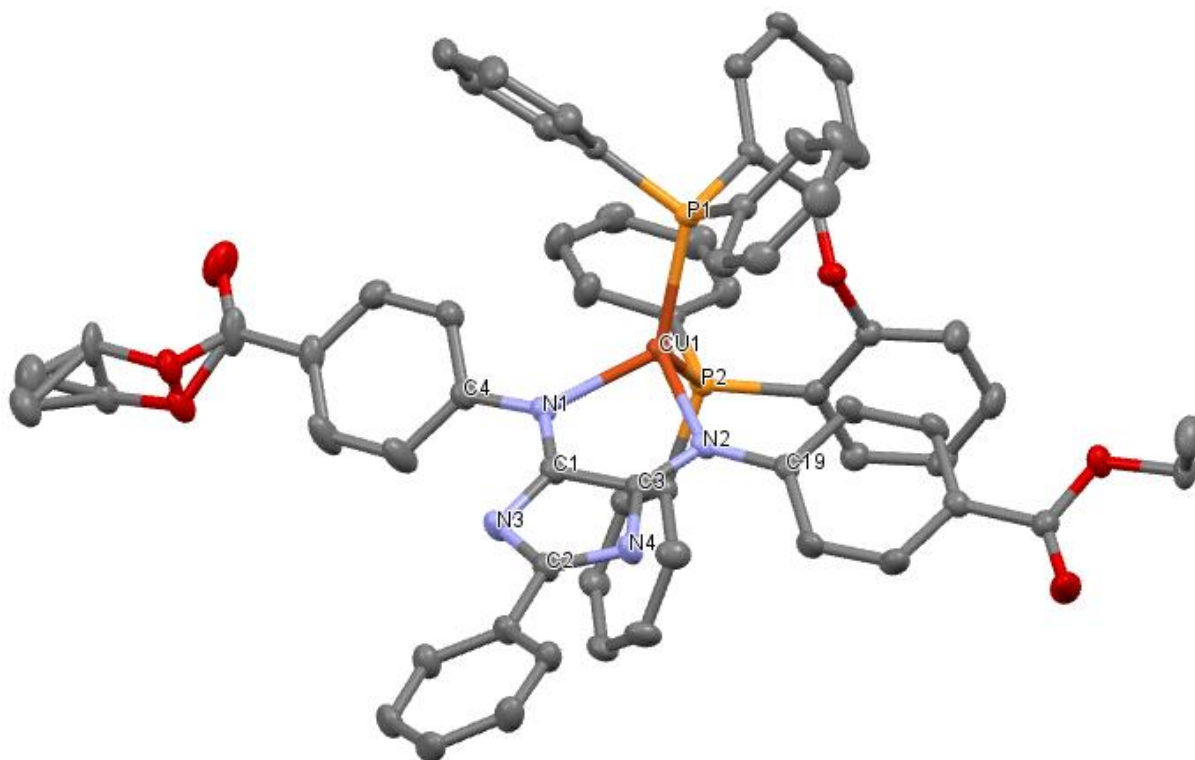

Figure S12 gives the molecular structure of **CuN1P1** with ellipsoids drawn at the 50% probability level. Hydrogen atoms are omitted for clarity. One  $\text{COOCH}_2\text{CH}_3$  group is disordered.

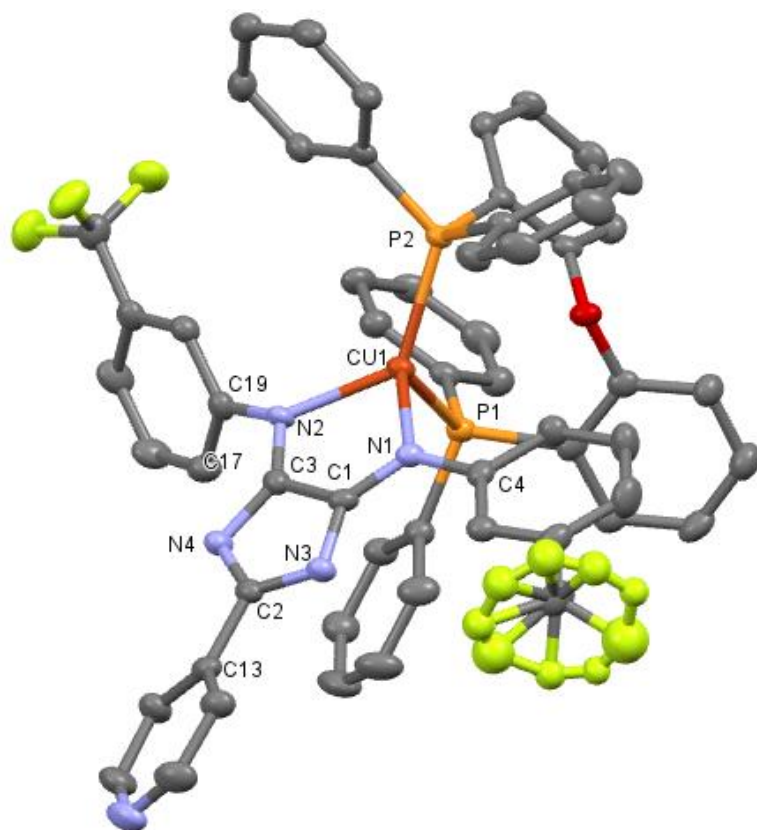

Figure S13 gives the molecular structure of **CuN2P1** with ellipsoids drawn at the 50% probability level. Hydrogen atoms and solvent molecules are omitted for clarity. One  $\text{CF}_3$  group is disordered.

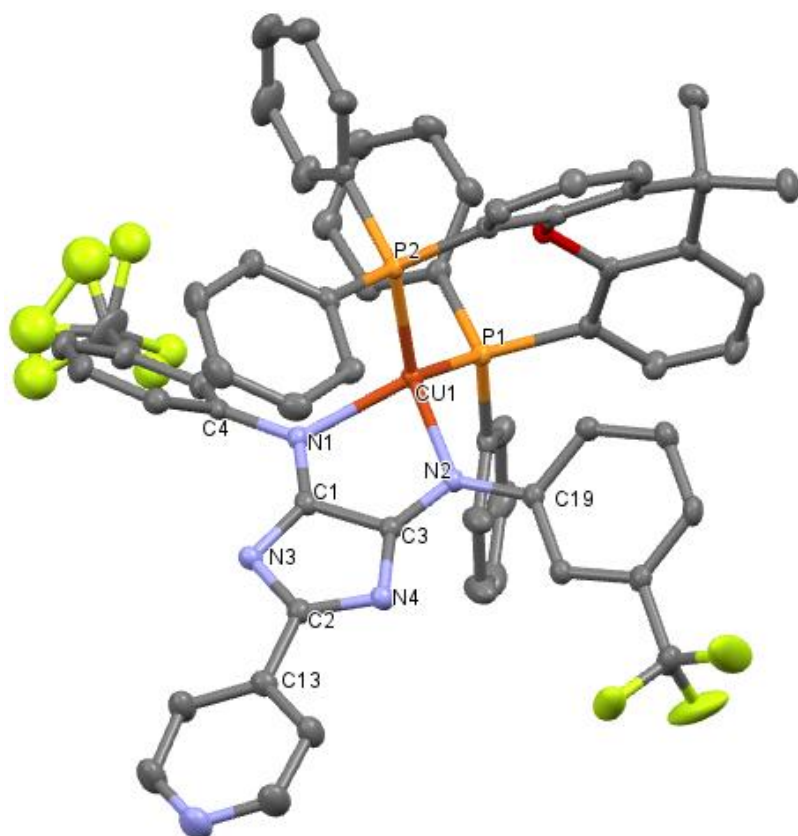

Figure S14 gives the molecular structure of **CuN2P2** with ellipsoids drawn at the 50% probability level. Hydrogen atoms are omitted for clarity. One CF<sub>3</sub> group is disordered.

Table S1 Crystal data and refinement details for the X-ray structure determinations of the compounds CuN1P1 - CuN2P2.

| Compound                                                     | CuN1P1                                                                         | CuN2P1                                                                                                                  | CuN1P2                                                                                                              | CuN2P2                                                                          |
|--------------------------------------------------------------|--------------------------------------------------------------------------------|-------------------------------------------------------------------------------------------------------------------------|---------------------------------------------------------------------------------------------------------------------|---------------------------------------------------------------------------------|
| formula                                                      | C <sub>63</sub> H <sub>51</sub> CuN <sub>4</sub> O <sub>5</sub> P <sub>2</sub> | C <sub>58</sub> H <sub>40</sub> CuF <sub>6</sub> N <sub>5</sub> OP <sub>2</sub> ,<br>C <sub>3</sub> H <sub>6</sub> O[*] | C <sub>66</sub> H <sub>55</sub> CuN <sub>4</sub> O <sub>5</sub> P <sub>2</sub> ,<br>CH <sub>2</sub> Cl <sub>2</sub> | C <sub>61</sub> H <sub>44</sub> CuF <sub>6</sub> N <sub>5</sub> OP <sub>2</sub> |
| fw (g·mol <sup>-1</sup> )                                    | 1069.56                                                                        | 1120.51[*]                                                                                                              | 1194.55                                                                                                             | 1102.49                                                                         |
| °C                                                           | -140(2)                                                                        | -140(2)                                                                                                                 | -140(2)                                                                                                             | -140(2)                                                                         |
| crystal system                                               | triclinic                                                                      | triclinic                                                                                                               | triclinic                                                                                                           | monoclinic                                                                      |
| space group                                                  | P $\bar{1}$                                                                    | P $\bar{1}$                                                                                                             | P $\bar{1}$                                                                                                         | P 2 <sub>1</sub> /c                                                             |
| a/ Å                                                         | 14.1809(3)                                                                     | 12.8088(4)                                                                                                              | 12.2239(2)                                                                                                          | 11.7550(1)                                                                      |
| b/ Å                                                         | 14.5825(3)                                                                     | 13.5384(5)                                                                                                              | 16.2189(3)                                                                                                          | 19.8468(3)                                                                      |
| c/ Å                                                         | 15.1972(3)                                                                     | 19.2330(7)                                                                                                              | 16.5242(3)                                                                                                          | 22.9847(4)                                                                      |
| $\alpha$ /°                                                  | 70.329(1)                                                                      | 88.555(2)                                                                                                               | 63.069(1)                                                                                                           | 90                                                                              |
| $\beta$ /°                                                   | 63.513(1)                                                                      | 71.411(2)                                                                                                               | 85.486(1)                                                                                                           | 100.928(1)                                                                      |
| $\gamma$ /°                                                  | 77.344(1)                                                                      | 69.456(2)                                                                                                               | 85.350(1)                                                                                                           | 90                                                                              |
| V/Å <sup>3</sup>                                             | 2639.77(9)                                                                     | 2946.03(18)                                                                                                             | 2907.91(9)                                                                                                          | 5265.07(13)                                                                     |
| Z                                                            | 2                                                                              | 2                                                                                                                       | 2                                                                                                                   | 4                                                                               |
| $\rho$ (g·cm <sup>-3</sup> )                                 | 1.346                                                                          | 1.263[*]                                                                                                                | 1.364                                                                                                               | 1.391                                                                           |
| $\mu$ (cm <sup>-1</sup> )                                    | 5.3                                                                            | 4.89[*]                                                                                                                 | 5.78                                                                                                                | 5.45                                                                            |
| measured data                                                | 20136                                                                          | 11717                                                                                                                   | 22742                                                                                                               | 35568                                                                           |
| data with I > 2 $\sigma$ (I)                                 | 10120                                                                          | 9397                                                                                                                    | 10487                                                                                                               | 10217                                                                           |
| unique data (R <sub>int</sub> )                              | 11670/0.0257                                                                   | 11717/0.0413                                                                                                            | 12546/0.0362                                                                                                        | 11970/0.0389                                                                    |
| wR <sub>2</sub> (all data, on F <sup>2</sup> ) <sup>a)</sup> | 0.0883                                                                         | 0.1176                                                                                                                  | 0.1430                                                                                                              | 0.1113                                                                          |
| R <sub>1</sub> (I > 2 $\sigma$ (I)) <sup>a)</sup>            | 0.0419                                                                         | 0.0597                                                                                                                  | 0.0552                                                                                                              | 0.0491                                                                          |
| S <sup>b)</sup>                                              | 1.097                                                                          | 1.075                                                                                                                   | 1.058                                                                                                               | 1.048                                                                           |
| Res. dens./e·Å <sup>-3</sup>                                 | 0.388/-0.416                                                                   | 0.723/-0.615                                                                                                            | 0.879/-1.100                                                                                                        | 1.439/-1.120                                                                    |
| absorpt method                                               | multi-scan                                                                     | multi-scan                                                                                                              | multi-scan                                                                                                          | multi-scan                                                                      |
| absorpt corr<br>T <sub>min</sub> /T <sub>max</sub>           | 0.7069/0.7456                                                                  | 0.6909/0.7456                                                                                                           | 0.6991/0.7456                                                                                                       | 0.7203/0.7456                                                                   |
| CCDC No.                                                     | 1432665                                                                        | 1432667                                                                                                                 | 1432666                                                                                                             | 1432668                                                                         |

[\*] derived parameters do not contain the contribution of the disordered solvent.

<sup>a)</sup> Definition of the R indices:  $R_1 = (\sum ||F_o| - F_c||) / \sum |F_o|$ ; $wR_2 = \{\sum [w(F_o^2 - F_c^2)^2] / \sum [w(F_o^2)^2]\}^{1/2}$  with  $w^{-1} = \sigma^2(F_o^2) + (aP)^2 + bP$ ;  $P = [2F_c^2 + \text{Max}(F_o^2)]/3$ ;<sup>b)</sup>  $S = \{\sum [w(F_o^2 - F_c^2)^2] / (N_o - N_p)\}^{1/2}$ .

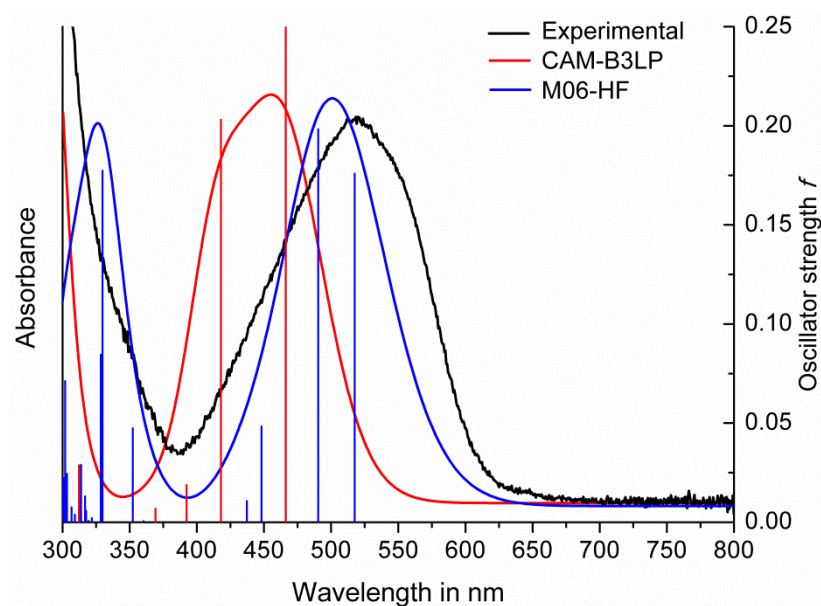

Figure S15 gives a comparison between the experimental UV-Vis absorption band of **CuN2P2** and the calculated spectra (CAM-B3LYP vs. M06-HF). The vertical bars indicate the calculated transitions. Calculations of the first 20 singlet transitions were made on the TD-DFT level of theory using either the CAM-B3LYP<sup>1</sup> functional or M06-HF<sup>2</sup> with the MDF10 basis set for copper and 6-31G(d) for the remainder. Convolution of the simulated spectra was accomplished with the GaussSum<sup>3</sup> program using Gauss functions for each transition with FWHM = 3000 cm<sup>-1</sup>.

Table S2 presents the percent contributions to selected frontier orbitals of **CuN2P2** in the singlet ground state (M06)

| No. | MO   | eV    | Sym. | Cu | N-Aryl | Imidazole | 2-Aryl | Phosphane |
|-----|------|-------|------|----|--------|-----------|--------|-----------|
| 282 | L+3  | -0.75 | A    | 43 | 5      | 4         | 12     | 36        |
| 281 | L+2  | -0.83 | A    | 3  | 6      | 2         | 4      | 85        |
| 280 | L+1  | -1.0  | A    | 3  | 3      | 1         | 0      | 93        |
| 279 | LUMO | -2.57 | A    | 2  | 17     | 60        | 20     | 2         |
| 278 | HOMO | -5.83 | A    | 31 | 5      | 12        | 1      | 51        |
| 277 | H-1  | -5.95 | A    | 9  | 31     | 51        | 0      | 9         |
| 276 | H-2  | -6.45 | A    | 35 | 3      | 15        | 0      | 47        |
| 275 | H-3  | -6.49 | A    | 43 | 23     | 26        | 1      | 7         |

Table S3 presents the percent contributions to selected frontier orbitals of **CuN2P2** in the singlet ground state (CAM-B3LYP)

| No. | MO   | eV    | Sym. | Cu | N-Aryl | Imidazole | 2-Aryl | Phosphane |
|-----|------|-------|------|----|--------|-----------|--------|-----------|
| 282 | L+3  | 0.45  | A    | 2  | 18     | 12        | 32     | 36        |
| 281 | L+2  | 0.36  | A    | 1  | 5      | 1         | 3      | 89        |
| 280 | L+1  | 0.17  | A    | 2  | 3      | 0         | 0      | 94        |
| 279 | LUMO | -1.59 | A    | 1  | 17     | 61        | 19     | 2         |
| 278 | HOMO | -6.81 | A    | 18 | 21     | 38        | 1      | 23        |
| 277 | H-1  | -6.88 | A    | 22 | 14     | 29        | 1      | 33        |
| 276 | H-2  | -7.52 | A    | 35 | 4      | 13        | 0      | 46        |
| 275 | H-3  | -7.56 | A    | 44 | 22     | 23        | 1      | 11        |

## References

1. T. Yanai, D. P. Tew, and N. C. Handy, *Chem. Phys. Lett.*, 2004, **393**, 51–57.
2. Y. Zhao and D. G. Truhlar, *Theor. Chem. Acc.*, 2008, **120**, 215–241.
3. N. M. O’Boyle, A. L. Tenderholt, and K. M. Langner, *J. Comput. Chem.*, 2008, **29**, 839–845.
